# Supplementary material for: Sustainability in Small and Medium-Sized Enterprises: A Systematic Literature Review and Future Research Agenda
Source: MDPI journal article supplement (doi:10.3390/su14116493), 2022-05-26
Supplement: s1 [file s1]

Archive with 1 entries (1 files):
- sustainability-1694009-supplementary.pdf
